# Supplementary material
Source: MDPI journal article supplement (https://www.mdpi.com/2073-4395/13/12/2948)
Supplement: s1 [file s1]

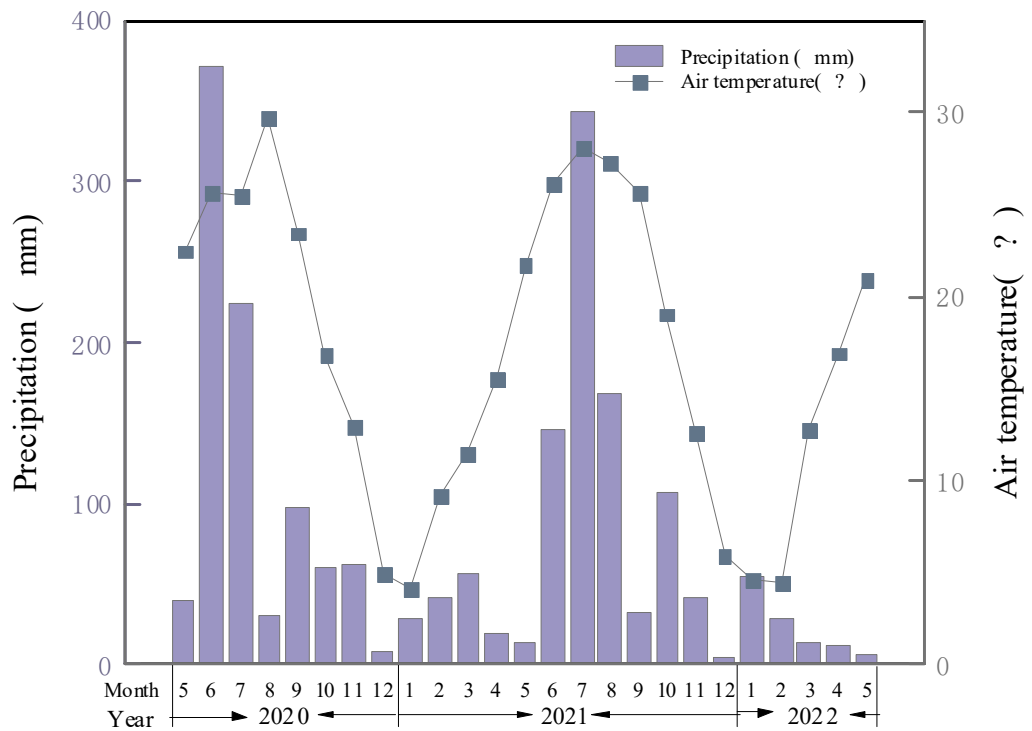

**Supplement Figure S1.** Precipitation and average temperature in different months of 2020 to 2022 during the observation period. Note: The abscissa is the month of rice and wheat growth period, and the ordinate is the monthly precipitation and average temperature. The experimental field is a typical rice-wheat rotation system of rice in summer (June to October) and wheat in winter (November to May).
