# Supplementary material
Source: MDPI journal article supplement (https://www.mdpi.com/2073-4395/13/12/2948)
Supplement: s1 [file s1 › Supplementary Table.pdf]

**Supplement Table S1. Indicators of soil-related nutrients at maturity for rice and wheat of the different treatments in the two years**

|                |     | <b>pH</b>  | <b>Organic C<br/>(g/kg)</b> | <b>TSN<br/>(g/kg)</b> | <b>Available K<br/>(mg/kg)</b> | <b>Exchangeable Ca<br/>(cmol/Kg)</b> | <b>Exchangeable<br/>Mg (cmol/Kg)</b> |
|----------------|-----|------------|-----------------------------|-----------------------|--------------------------------|--------------------------------------|--------------------------------------|
| <b>20rice</b>  | FP  | 6.27±0.11a | 23.53±2.19b                 | 1.57±0.09b            | 70.27±8.23b                    | 17.98±1.60a                          | 3.79±0.13a                           |
|                | SP  | 6.25±0.14a | 29.38±1.43a                 | 1.97±0.03a            | 82.71±11.98ab                  | 17.04±0.58a                          | 3.76±0.15a                           |
|                | RSP | 6.17±0.31a | 30.89a±4.13a                | 2.05±0.34a            | 69.03±3.80b                    | 17.25±0.61a                          | 3.69±0.09a                           |
|                | P0  | 6.03±0.16a | 31.87a±4.20a                | 2.02±0.19a            | 76.99±3.92b                    | 17.64±1.33a                          | 3.50±0.32a                           |
|                | N0  | 6.38±0.13a | 28.02a±3.14a                | 1.91±0.17a            | 99.13±12.84a                   | 17.41±0.20a                          | 3.65±0.12a                           |
| <b>20wheat</b> | FP  | 6.33±0.14a | 17.28±1.20b                 | 1.11±0.07a            | 74.33±5.31a                    | 17.85±1.21a                          | 3.87±0.21a                           |
|                | SP  | 6.28±0.01a | 20.47±2.78ab                | 1.29±0.14a            | 86.33±6.65a                    | 18.7±0.19a                           | 4.27±0.34a                           |
|                | RSP | 6.33±0.06a | 22.19±3.56a                 | 1.36±0.19a            | 84.33±8.26a                    | 18.70±2.17a                          | 3.95±0.27a                           |
|                | P0  | 6.37±0.18a | 21.89±2.90a                 | 1.34±0.13a            | 86.67±2.05a                    | 17.31±1.07a                          | 3.76±0.17a                           |
|                | N0  | 6.29±0.03a | 19.30±1.49ab                | 1.28±0.15a            | 88.67±10.40a                   | 18.89±0.49a                          | 3.93±0.05a                           |
| <b>21rice</b>  | FP  | 6.17±0.06a | 21.24±0.46a                 | 1.57±0.09a            | 77.94±1.72a                    | 17.86±0.98a                          | 3.36±0.19a                           |
|                | SP  | 6.20±0.02a | 20.38±0.71a                 | 1.97±0.03a            | 83.38±2.30a                    | 17.43±0.43a                          | 3.65±0.09a                           |
|                | RSP | 5.98±0.16a | 20.89±1.07a                 | 2.05±0.34a            | 80.8±4.45a                     | 17.49±0.85a                          | 3.58±0.15a                           |
|                | P0  | 6.11±0.11a | 20.75±0.80a                 | 2.02±0.19a            | 78.92±2.68a                    | 17.38±0.29a                          | 3.27±0.13a                           |
|                | N0  | 6.31±0.10a | 20.69±0.25a                 | 1.91±0.17a            | 79.13±1.34a                    | 17.12±0.24a                          | 3.52±0.19a                           |
| <b>21wheat</b> | FP  | 6.22±0.08a | 18.95±0.40a                 | 1.31±0.07a            | 78.67±0.94a                    | 18.41±0.93a                          | 3.78±0.06a                           |
|                | SP  | 6.28±0.01a | 20.14±1.15a                 | 1.32±0.10a            | 83±5.35a                       | 18.59±0.07a                          | 3.97±0.04a                           |
|                | RSP | 6.32±0.06a | 21.19±1.21a                 | 1.26±0.05a            | 81.00±3.56a                    | 18.27±1.06a                          | 4.01±0.15a                           |
|                | P0  | 6.24±0.06a | 19.89±0.77a                 | 1.34±0.06a            | 86.67±2.05a                    | 17.59±0.72a                          | 3.80±0.06a                           |
|                | N0  | 6.3±0.03a  | 19.63±1.11a                 | 1.26±0.05a            | 82.00±5.72a                    | 18.91±0.42a                          | 3.92±0.05a                           |

Different lowercase letters in a row indicate significant difference across the five treatments in the same season at  $p < 0.05$
